# Supplementary material
Source: Springer Nature journal article supplement (https://www.springermedizin.de/resource/supplementary/12936_2009_945_MOESM9_ESM.pdf/9548594)

ALTERNATIVE TRAP CATCH / HLC

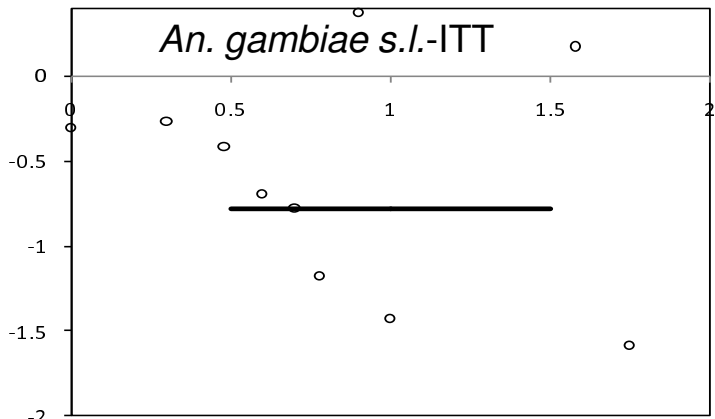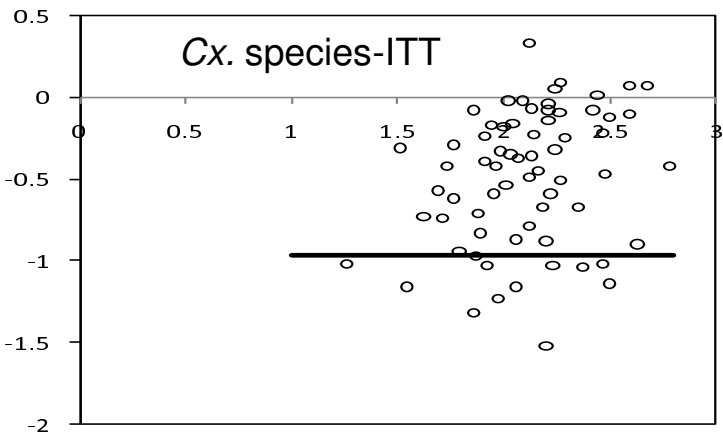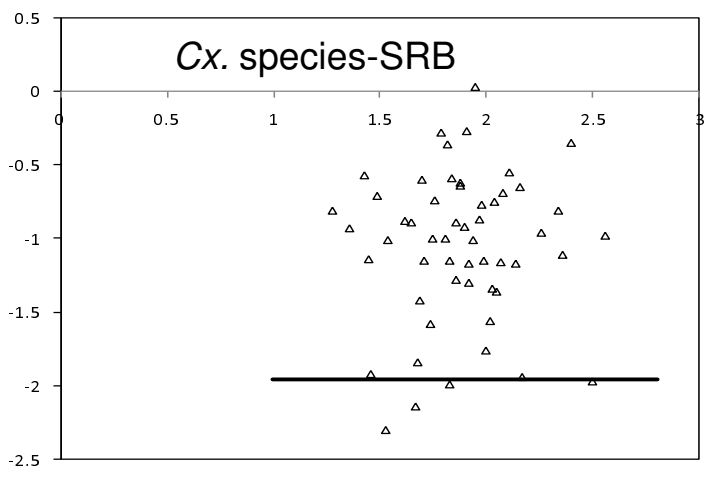

HLC+ALTERNATIVE TRAP CATCH

Supplement: MOESM9 [file 9548594]
